# Supplementary material for: Arabidopsis ABA Receptor RCAR1/PYL9 Interacts with an R2R3-Type MYB Transcription Factor, AtMYB44
Source: PubMed Central journal article supplement (PMC4057743; doi:10.3390/ijms15058473), 2014-05-13
Supplement: ijms-15-08473-s001.pdf [file ijms-15-08473-s001.pdf]

## Supplementary Information

**Table S1.** RCAR1/PYL9-interacting proteins obtained by yeast two-hybrid assay in *Arabidopsis*.

| Clone                                                            | Accession Numbers<br>in TAIR <sup>a</sup> | AA Sequence<br>in Library | AA Sequence<br>in TAIR <sup>a</sup> | Numbers of<br>Clones |
|------------------------------------------------------------------|-------------------------------------------|---------------------------|-------------------------------------|----------------------|
| AtMYB44                                                          | AT5G67300                                 | 48-305                    | 305                                 | 3                    |
| AtMYB70                                                          | AT2G23290                                 | 68-144                    | 309                                 | 1                    |
| AtMYB77                                                          | AT3G50060                                 | 26-286                    | 301                                 | 1                    |
| ABI2                                                             | AT5G57050                                 | 56-227                    | 423                                 | 4                    |
| Leucine-rich repeat receptor-like<br>protein kinase 902 (RLK902) | AT3G17840                                 | 459-647                   | 647                                 | 1                    |
| UDP-glucosyl transferase 71C5<br>(UGT71C5)                       | AT1G07240                                 | 323-480                   | 480                                 | 1                    |
| Gln synthetase (ATGSR2)                                          | AT1G66200                                 | 245-414                   | 430                                 | 6                    |
| Glutamyl-tRNA reductase (HEMA1)                                  | AT1G58290                                 | 323-543                   | 543                                 | 12                   |
| Starch excess1 (SEX1)                                            | AT1G10760                                 | 1186-1385                 | 1399                                | 4                    |
| ArathEULS3                                                       | AT2G39050                                 | 160-317                   | 317                                 | 2                    |
| UBQ10                                                            | AT4G05320                                 | 32-324                    | 464                                 | 2                    |
| Indole-3-acetonitrile nitrile hydratase<br>(NIT1)                | AT3G44310                                 | 192-346                   | 346                                 | 1                    |
| Voltage dependent anion channel 3<br>(VDAC3)                     | AT5G15090                                 | 61-274                    | 274                                 | 2                    |

<sup>a</sup> TAIR, The *Arabidopsis* Information Resource.

**Table S2.** Primers used in this article.

| Assays                                 | Genes                                                 | Primer Sequences (5'-3') <sup>a</sup>                                                                  |                                                                                   |
|----------------------------------------|-------------------------------------------------------|--------------------------------------------------------------------------------------------------------|-----------------------------------------------------------------------------------|
| Primers for yeast two-hybrid assay     | <i>RCAR1/PYL9</i>                                     | F: CTTGAATTCATGGACGGCGTTGAAGGCG<br>R: AA <b>CTGCAG</b> TCACTGAGTAATGTCCTGAGAAGCC                       |                                                                                   |
|                                        | <i>RCAR3/PYL8</i>                                     | F: CCGGAATTCATGGAAGCTAACGGGATTGAGAAC<br>R: AA <b>CTGCAG</b> TTAGACTCTCGATTCTGTCGTGTCTTG                |                                                                                   |
|                                        | <i>RCAR8/PYL5</i>                                     | F: GGAATTCATGGAACTTCTCAAAAATATCATACTG<br>R: CGGGATCCTTACAACCTTAGATGAGCCACCCTC                          |                                                                                   |
|                                        | <i>RCAR11/PYR1</i>                                    | F: CCGGAATTCATGCCTTCGGAGTTAACACC<br>R: CGCGGATCCTCACGTCACCTGAGAACCACCT                                 |                                                                                   |
|                                        | <i>AtMYB44</i>                                        | F: TGGAATTCATGGCTGATAGGATCAAAGGTC<br>R: TCC <b>CTCGAG</b> TAAACAGTTTCTAATAATCTCAC                      |                                                                                   |
|                                        | <i>AtMYB70</i>                                        | F: TGGAATTCATGTCTGGTTCGACCCGG<br>R: AGC <b>CTCGAG</b> CTACTCGATCCTACCTAATCCAAT                         |                                                                                   |
|                                        | <i>AtMYB73</i>                                        | F: TAGGAATTCATGTCAAACCCGACCCGT<br>R: ATC <b>CTCGAG</b> CTGAACTTTTATTTTCCCGAG                           |                                                                                   |
|                                        | <i>AtMYB77</i>                                        | F: TGGAATTCATGGCTGATCGTGTAAAGGT<br>R: TAC <b>CTCGAG</b> CTACTCAACCTTAGGTGTTACTACTC                     |                                                                                   |
|                                        | <i>AtMYB2</i>                                         | F: TGGAATTCATGGAAGATTACGAGCGAATA<br>R: TAC <b>CTCGAG</b> TTAATTATACGAATACGATGTCGTA                     |                                                                                   |
|                                        | Primers for GST pull-down assay and PP2C enzyme assay | <i>RCAR1/PYL9</i>                                                                                      | F: CTTGAATTCATGGACGGCGTTGAAGGCG<br>R: TCC <b>CTCGAG</b> TCACTGAGTAATGTCCTGAGAAGCC |
|                                        |                                                       | <i>AtMYB44</i>                                                                                         | F: TGGAATTCATGGCTGATAGGATCAAAGGTC<br>R: TCC <b>CTCGAG</b> TAAACAGTTTCTAATAATCTCAC |
|                                        |                                                       | <i>ABI1</i>                                                                                            | F: TTAGGATCCATGGAGGAAGTATCTCCGGC<br>R: CTC <b>AAGCTT</b> CAGTTCAAGGGTTTGCTC       |
| Primers for BIFC assay                 | <i>RCAR1/PYL9</i>                                     | F: TGTCTAGAAATGGACGGCGTTGAAGGCG<br>R: TCC <b>GTTCGAC</b> CTGAGTAATGTCCTGAGAAGCC                        |                                                                                   |
|                                        | <i>AtMYB44</i>                                        | F: TGTCTAGAAATGGCTGATAGGATCAAAGGTC<br>R: TCC <b>GTTCGAC</b> CTCGATTCTCCCAACTCCAATTTG                   |                                                                                   |
| Primers for qRT-PCR analysis           | <i>AtMYB44</i>                                        | F: GTTGTGCTACCGCTTCCTATCG<br>R: ATGTAACCTCACTTCCGCCT                                                   |                                                                                   |
|                                        | <i>RAB18</i>                                          | F: ATGGCGTCTTACCAGAACCGT<br>R: CCAGATCCGGAGCGGTGAAGC                                                   |                                                                                   |
|                                        | <i>ACTIN2/8</i>                                       | F: GGTAACATTGTGCTCAGTGGTGG<br>R: AACGACCTTAATCTTCATGCTGC                                               |                                                                                   |
| Primers for transient activation assay | <i>RCAR1/PYL9</i>                                     | F: TGTCTAGAAATGGACGGCGTTGAAGGCG<br>R: CGAGCTCTCA <b>AGCGTAATCTGGAACATCGTATGGGTA</b> CTGAGTAATGTCCTG    |                                                                                   |
|                                        | <i>AtMYB44</i>                                        | F: TGTCTAGAAATGGCTGATAGGATCAAAGGTC<br>R: CGAGCTCTCA <b>ATCCTCCTCAGAAATCAACTTTTGCTC</b> CTCGATTCTCCCAAC |                                                                                   |

<sup>a</sup> Restriction sites are marked in red, and nucleotide sequences of HA-tag or Myc-tag are marked in blue.

F indicates forward primer, and R indicates reverse primer.
